# Supplementary material
Source: PubMed Central journal article supplement (PMC3898646)
Supplement: supp_fj.13-240861_13-240861SuppData.pdf [file supp_fj.13-240861_13-240861SuppData.pdf]

**Data Supplement:**

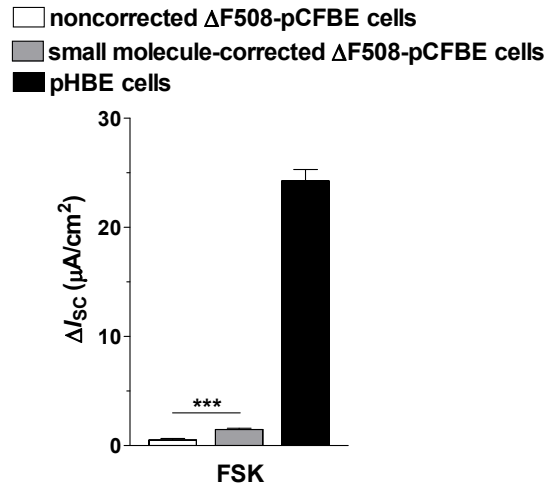

**Supplementary Figure 1.** Comparison of CFTR currents in pHBE and  $\Delta F508$ -pCFBE cells. Shown is the maximal  $I_{sc}$  induced by Forskolin (FSK; 10  $\mu M$ ) in noncorrected or small-molecule-corrected  $\Delta F508$ -pCFBE cells (combination of experiments with VRT640, VRT325 and VX809 shown in Fig. 4) compared to that of non-CF pHBE cells. Data represent the mean  $\pm$  sem ( $n \geq 6$ ). \*\*\*( $p < 0.001$ )

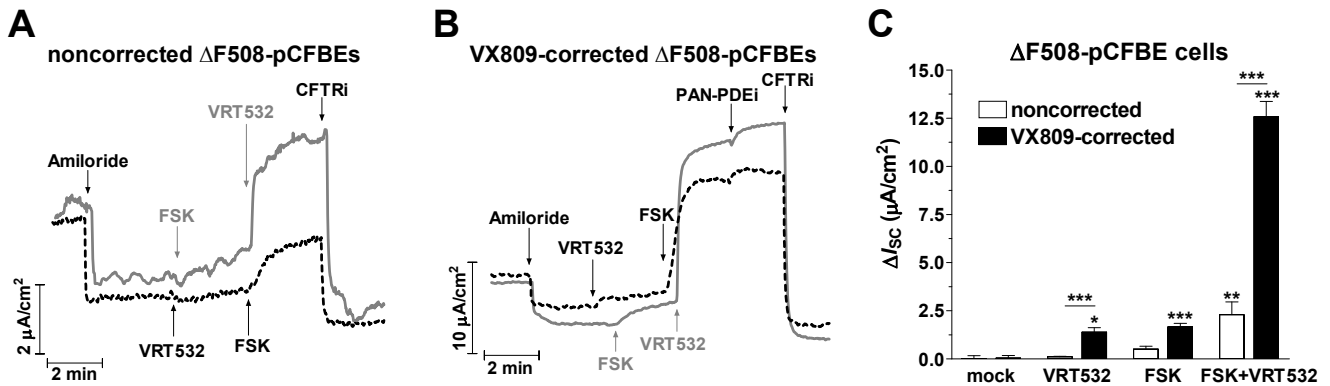

**Supplementary Figure 2.** CFTR correctors, activators and potentiators synergize to maximize CFTR currents in  $\Delta F508$ -pCFBE cells. Cultures were incubated for 48 h in the presence or absence of the CFTR corrector VX809 (10  $\mu M$ , basolateral) and CFTR-dependent  $I_{sc}$  was then recorded in response to treatment with the CFTR potentiator VRT532 (20  $\mu M$ ) and/or Forskolin (FSK; 10  $\mu M$ ) and the PAN-selective PDE inhibitor IBMX (200  $\mu M$ ) followed by treatment with CFTR<sub>inh</sub>-172 (CFTRi; 20  $\mu M$ ). A/B) Representative  $I_{sc}$  traces induced by FSK and VRT532 in noncorrected (A) and VX809-corrected (B)  $\Delta F508$ -pCFBE cells. C) Average  $I_{sc}$  induced by VRT532 and/or FSK in noncorrected ( $n \geq 5$ ) and VX809-corrected ( $n \geq 19$ )  $\Delta F508$ -pCFBE cells. Data represent the mean  $\pm$  sem. \*\*\*( $p < 0.001$ ); \*\*( $p < 0.01$ ); \*( $p < 0.05$ )
